# Supplementary material
Source: publisher figshare collection journal article supplement (https://tandf.figshare.com/ndownloader/files/17891309)
Supplement: Supplementary file 1 [file 17891309]

**Supplementary Table**

**Supplementary Table 1.** Comparison of chronic illness at baseline between ischemic stroke cases and controls

|  | Cases (n=138) | Controls (n=276) | P value a |
| --- | --- | --- | --- |
| Hypertension, n (%) | 58 (42.0) | 86 (31.2) | 0.037 |
| Diabetes, n (%) | 24 (16.7) | 27 (9.8) | 0.039 |
| Coronary heart disease, n(%) | 0 (0) | 0 (0) | - |

a Pearson χ2 test.

**Supplementary Table 2.** The assignment for weighted coefficient of three SNPs in OR-GRS

| Gene | rs No. | Allele(major/minor) | Risk allele | ORa | ln(OR) a |
| --- | --- | --- | --- | --- | --- |
| *CRP* | rs1800947 | G/C | C | 2.08 | 0.73 |
| *HNF1A* | rs1169288 | A/C | C | 1.45 | 0.37 |
| *APOE* | rs440446 | C/G | C | 1.58 | 0.45 |
| a OR is calculated by the addictive model after adjustment for BMI, smoking, alcohol drinking, tea drinking, intake of fruits, vegetables, red meat and white meat, hypertension and diabetes mellitus. | | | | | |
